# Supplementary material for: Integrative Single‐Cell Transcriptomics and Epigenomics Mapping of the Fetal Retina Developmental Dynamics
Source: PubMed Central journal article supplement (PMC10238188; doi:10.1002/advs.202206623), 2023-04-05
Supplement: ADVS-10-2206623-s001.pdf [file ADVS-10-2206623-s001.pdf]

## Supporting Information

for *Adv. Sci.*, DOI 10.1002/adv.202206623

Integrative Single-Cell Transcriptomics and Epigenomics Mapping of the Fetal Retina  
Developmental Dynamics

*Ruonan Li, Jiangyi Liu, Ping Yi, Xianli Yang, Jun Chen, Chenyang Zhao, Xingyun Liao, Xiaotang Wang, Zongren Xu, Huiping Lu, Hongshun Li, Zhi Zhang, Xianyang Liu, Junjie Xiang, Ke Hu, Hongbo Qi, Jia Yu, Peizeng Yang and Shengping Hou\**

## Supplementary material

### **Integrative single-cell transcriptomics and epigenomics mapping of the fetal retina developmental dynamics**

Ruonan Li<sup>1,2,3,4#</sup>, Jiangyi Liu<sup>1,2,3,4#</sup>, Ping Yi<sup>5#</sup>, Xianli Yang<sup>5#</sup>, Jun Chen<sup>6</sup>, Chenyang Zhao<sup>1,2,3,4</sup>, Xingyun Liao<sup>1,2,7</sup>, Xiaotang Wang<sup>1,2,3,4</sup>, Zongren Xu<sup>1,2</sup>, Huiping Lu<sup>1,2,3,4</sup>, Hongshun Li<sup>1,2,3,4</sup>, Zhi Zhang<sup>1,2,3,4</sup>, Xianyang Liu<sup>1,2,3,4</sup>, Junjie Xiang<sup>1,2,3,4</sup>, Ke Hu<sup>1,2,3,4</sup>, Hongbo Qi<sup>6,8</sup>, Jia Yu<sup>9,10</sup>, Peizeng Yang<sup>1,2,3,4</sup>, Shengping Hou<sup>1,2,3,4,11\*</sup>

<sup>1</sup>The First Affiliated Hospital of Chongqing Medical University, Chongqing, 400016, P. R. China.

<sup>2</sup>Chongqing Key Laboratory of Ophthalmology, Chongqing, 400016, P. R. China.

<sup>3</sup>Chongqing Eye Institute, Chongqing, 400016, P. R. China.

<sup>4</sup>Chongqing Branch (Municipality Division) of National Clinical Research Center for Ocular Diseases, Chongqing, 400016, P. R. China.

<sup>5</sup>Department of Obstetrics and Gynecology, The Third Affiliated Hospital of Chongqing Medical University, Chongqing, 401120, P. R. China.

<sup>6</sup>Department of Obstetrics, Women and Children's Hospital of Chongqing Medical University, Chongqing, 401147, P. R. China.

<sup>7</sup>Department of Medical Oncology, Chongqing University Cancer Hospital, Chongqing, 400030, P. R. China.

<sup>8</sup>Chongqing Key Laboratory of Maternal and Fetal Medicine, The First Affiliated Hospital of Chongqing Medical University, Chongqing, 400016, P. R. China.

<sup>9</sup>State Key Laboratory of Medical Molecular Biology, Department of Biochemistry and Molecular Biology, Haihe Laboratory of Cell Ecosystem, Institute of Basic Medical Sciences, Chinese Academy of Medical Sciences, School of Basic Medicine, Peking Union Medical College, Beijing, 100005, P. R. China.

<sup>10</sup>The Key Laboratory of RNA and Hematopoietic Regulation, Chinese Academy of Medical Sciences, Beijing, 100005, P. R. China.

<sup>11</sup>Beijing Institute of Ophthalmology, Beijing Tongren Eye Center, Beijing Tongren Hospital, Capital Medical University, Beijing Ophthalmology & Visual Sciences Key Laboratory, Beijing, 100730, China.

\*Corresponding author: Shengping Hou Ph.D, The First Affiliated Hospital of Chongqing Medical University, Chongqing 400016, China; Beijing Institute of Ophthalmology, Beijing Tongren Hospital, Capital Medical University, Beijing, 100730, China.

E-mail address: sphou828@163.com; [sphou828@cqmu.edu.cn](mailto:sphou828@cqmu.edu.cn); Telephone number: 0086-10-58265941

#These authors contributed equally to this work.

## Supplementary Figures

## Figure S1

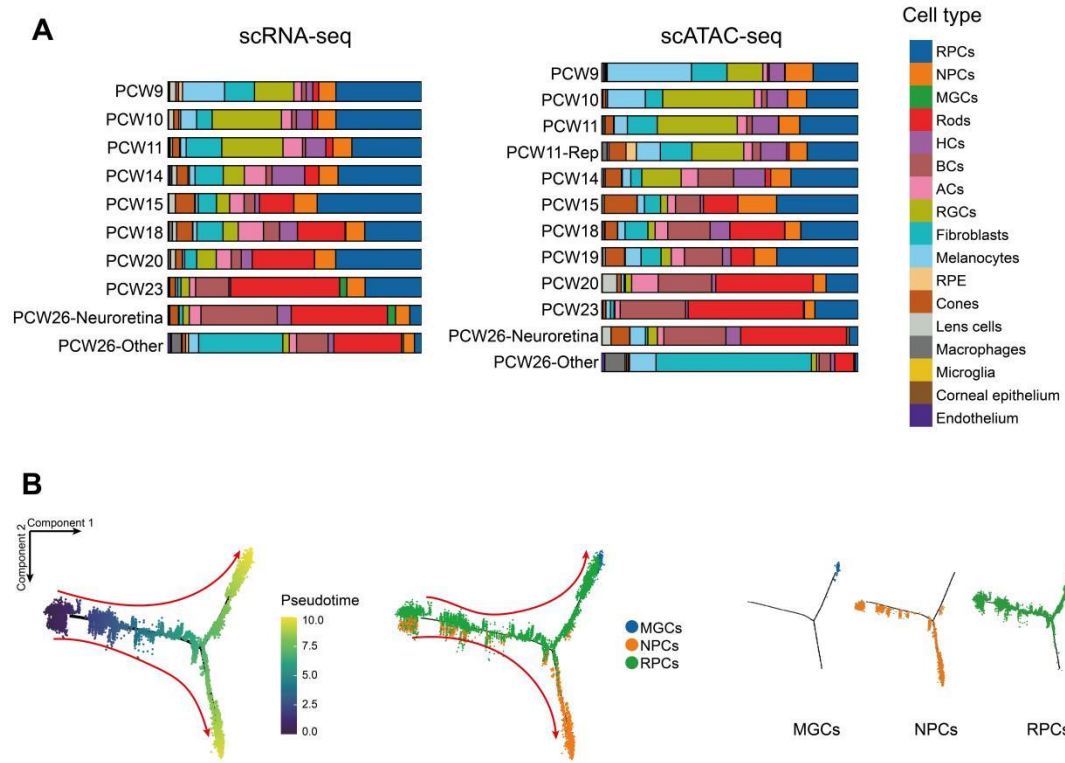

**Figure S1. Proportion of ocular cell types and developmental trajectories from RPCs. (A)** Proportion of cell ages for each cell type from scRNA-seq and scATAC-seq. **(B)** Plots showing the developmental trajectories from RPCs colored by pseudo-time and cell type.

Figure S2

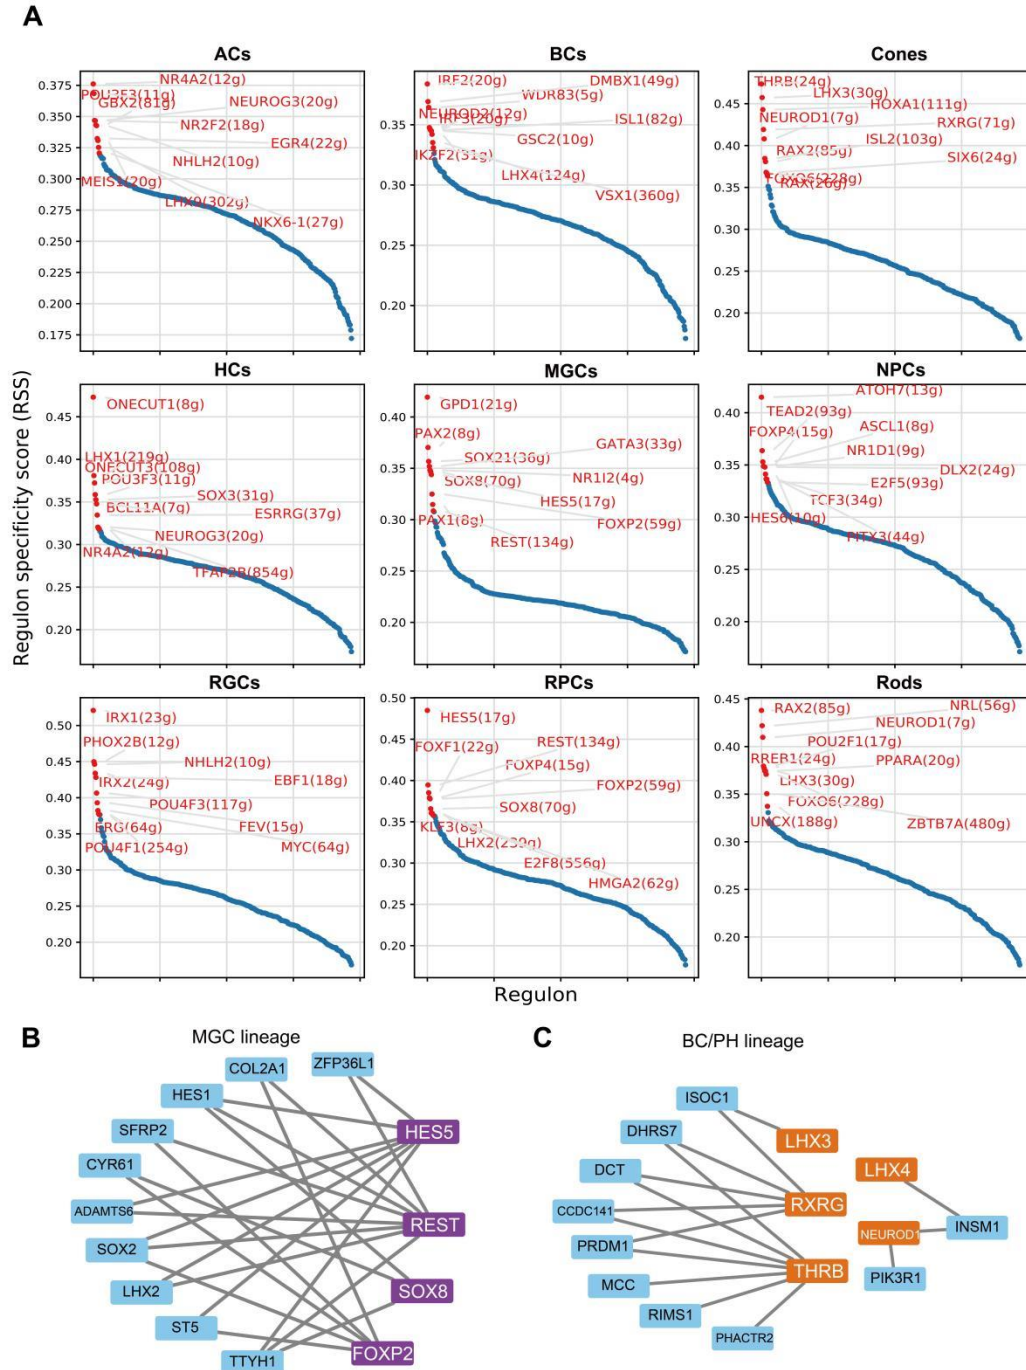

Figure S3

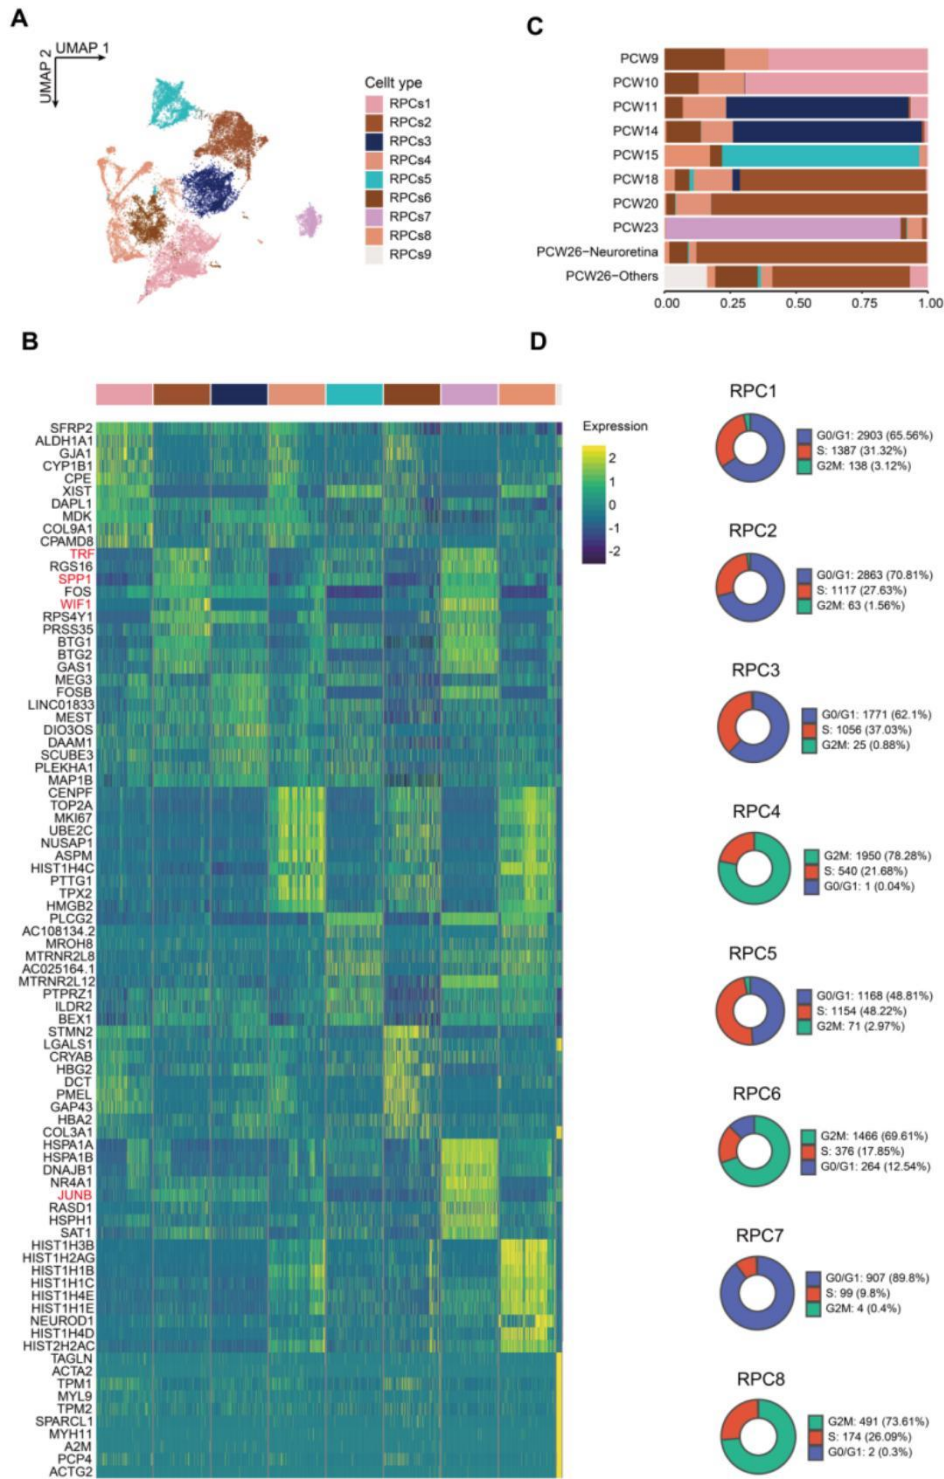

**Figure S3. RPC subpopulations.** (A) UMAP embedding of RPC subpopulations. (B) Heatmap showing the top ten DEGs of RPC subclusters. (C) Proportion of cell ages for RPC subpopulations. (D) Donut plots showing the proportion of cells in the G1, S, and G2M phase in RPC subclusters.

Figure S4

A

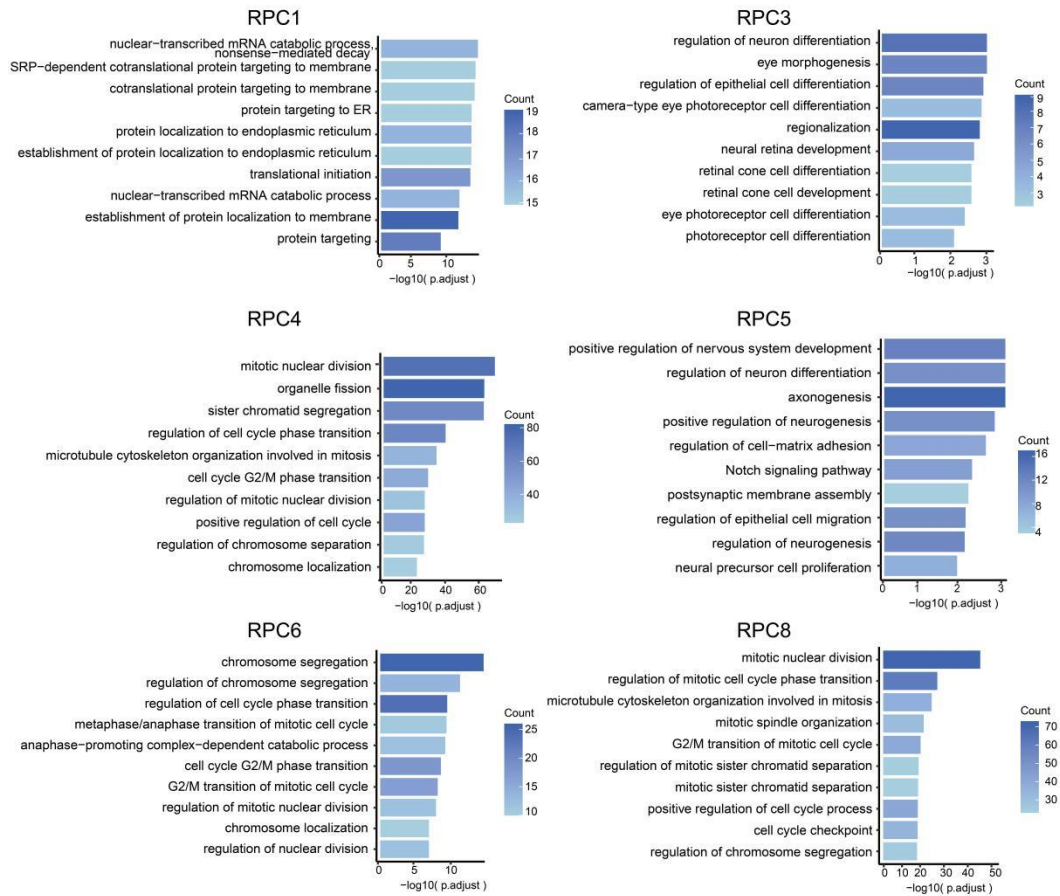

B

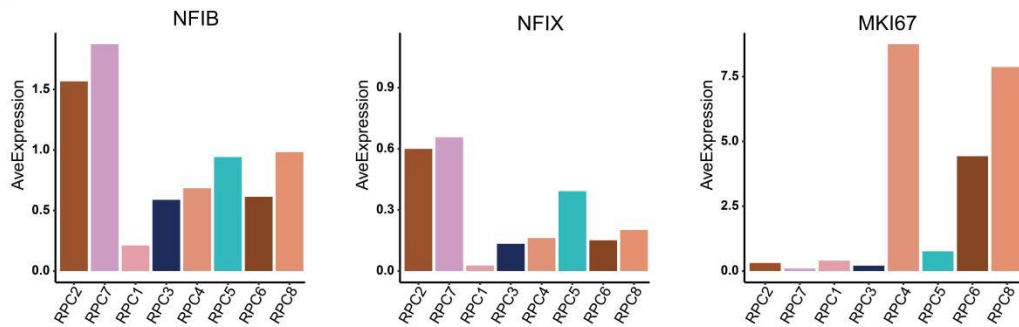

**Figure S4. Features of RPC subpopulations. (A)** Bar plots showing the top GO: BP terms calculated using DEGs in RPC subpopulations. **(B)** Histograms showing expression of *NFIB*, *NFIX* and *MKI67* in RPC subpopulations.

Figure S5

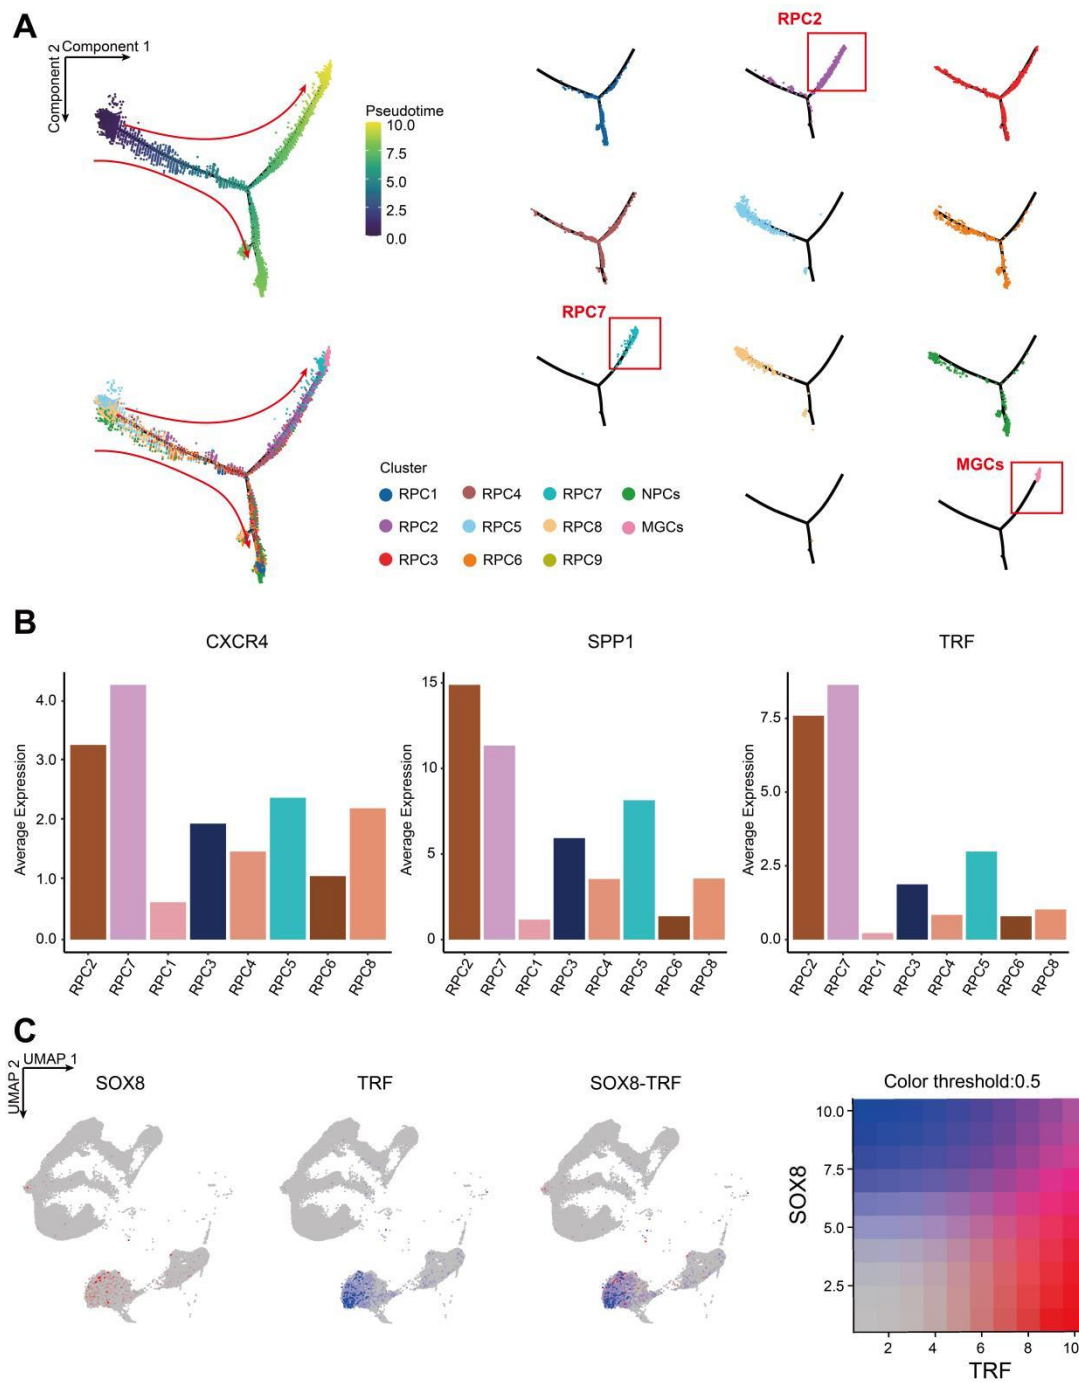

**Figure S5. Development from RPCs to MGCs. (A)** Plots showing the developmental trajectories from RPCs colored by pseudo-time and cell type. **(B)** Histograms showing expression of *CXCR4*, *SPP1* and *TRF* in RPC subpopulations. **(C)** The combined expression of *SOX8* and *TRF*.



Figure S6

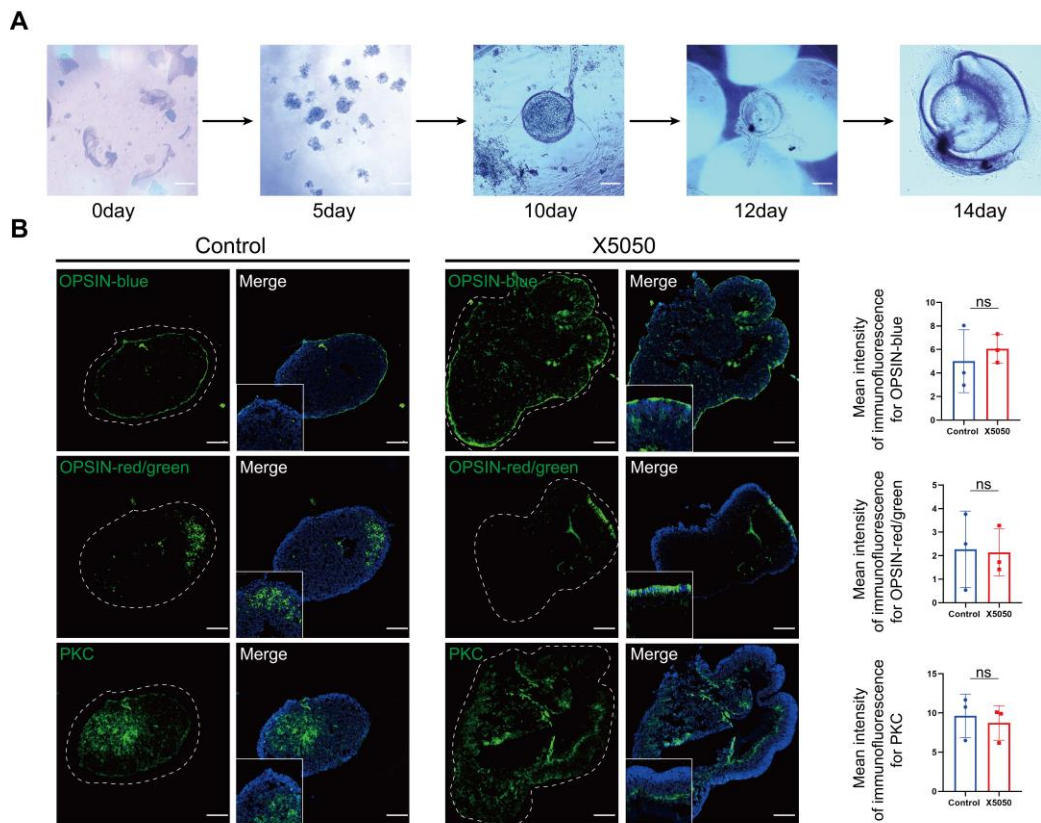

**Figure S6. Validation of REST in MGC development. (A)** *In vitro* retinosphere formation, Scale bar, 250  $\mu$ m. **(B)** Immunofluorescent staining of OPSIN-Blue, OPSIN-Red/Green, and PKC in control and X5050-treated fetal retinospheres after 48 h. Scale bar, 100  $\mu$ m. Bar plots showing the mean immunofluorescence intensity for OPSIN-Blue, OPSIN-Red/Green and PKC staining. Data are presented as mean  $\pm$  SEM.  $n = 3$  independent replicates for each retinosphere. Student's  $t$ -test was performed between each X5050-treated retinosphere and the control for each gene.  $p$ -values between all retinospheres and control are provided.

Figure S7

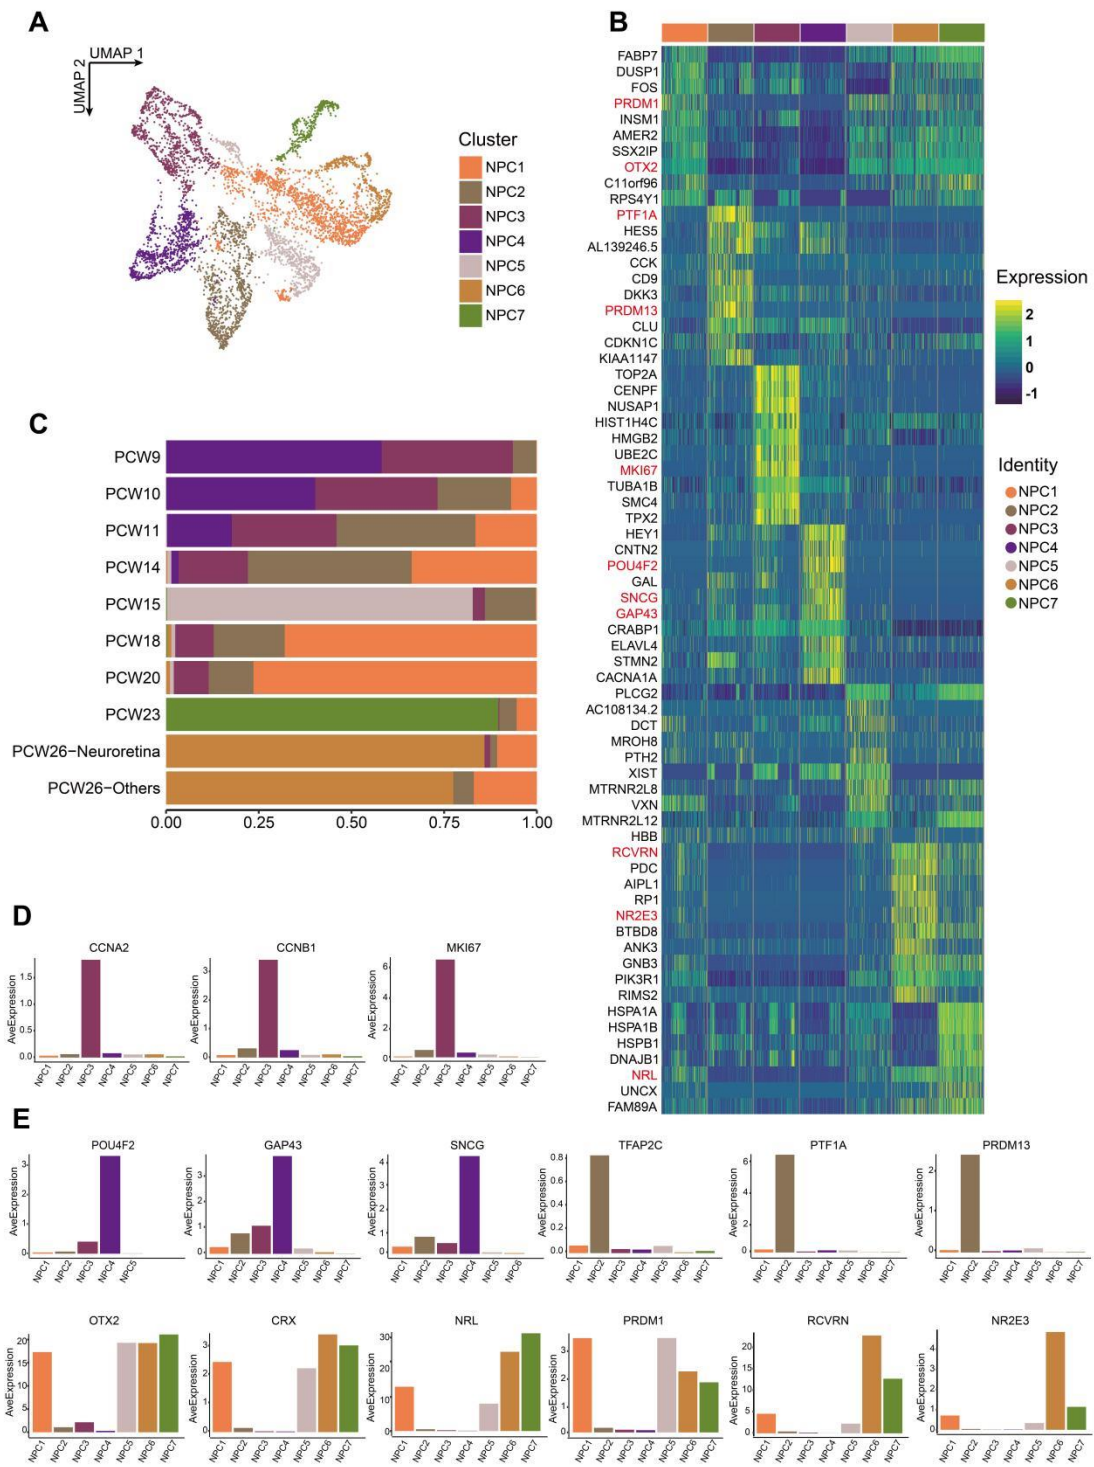

**Figure S7. NPC subpopulations. (A)** UMAP embedding of NPC subpopulations. **(B)** Heatmap showing the top ten DEGs of NPC subclusters. **(C)** Proportion of cell ages for NPC subpopulations. **(D)** Histograms showing expression of *CCNA2*, *CCNB1*, and *MKI67* in NPC subpopulations. **(E)** Histograms showing expression of related genes in NPC subpopulations.

Figure S8

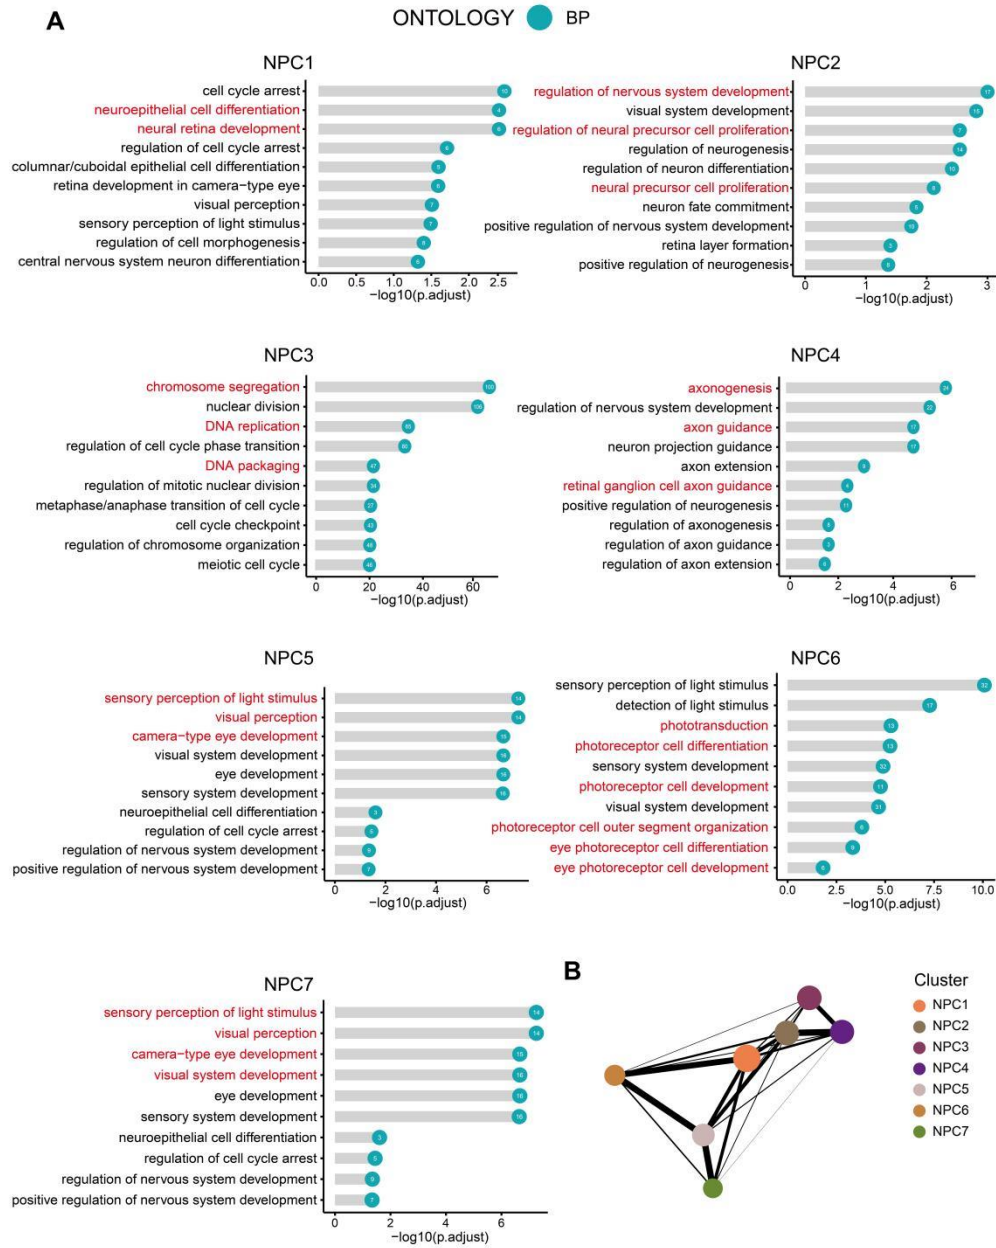

**Figure S8. Features of NPC subpopulations and the differentiation trajectory within NPCs. (A)** Bar plots showing the top GO: BP terms calculated using DEGs in NPC subpopulations. **(B)** Partition-based graph abstraction (PAGA) trajectory model imposed on the visualization of the differentiation trajectory in NPCs. The size of the dots is proportional to the number of cells in the clusters.

Figure S9

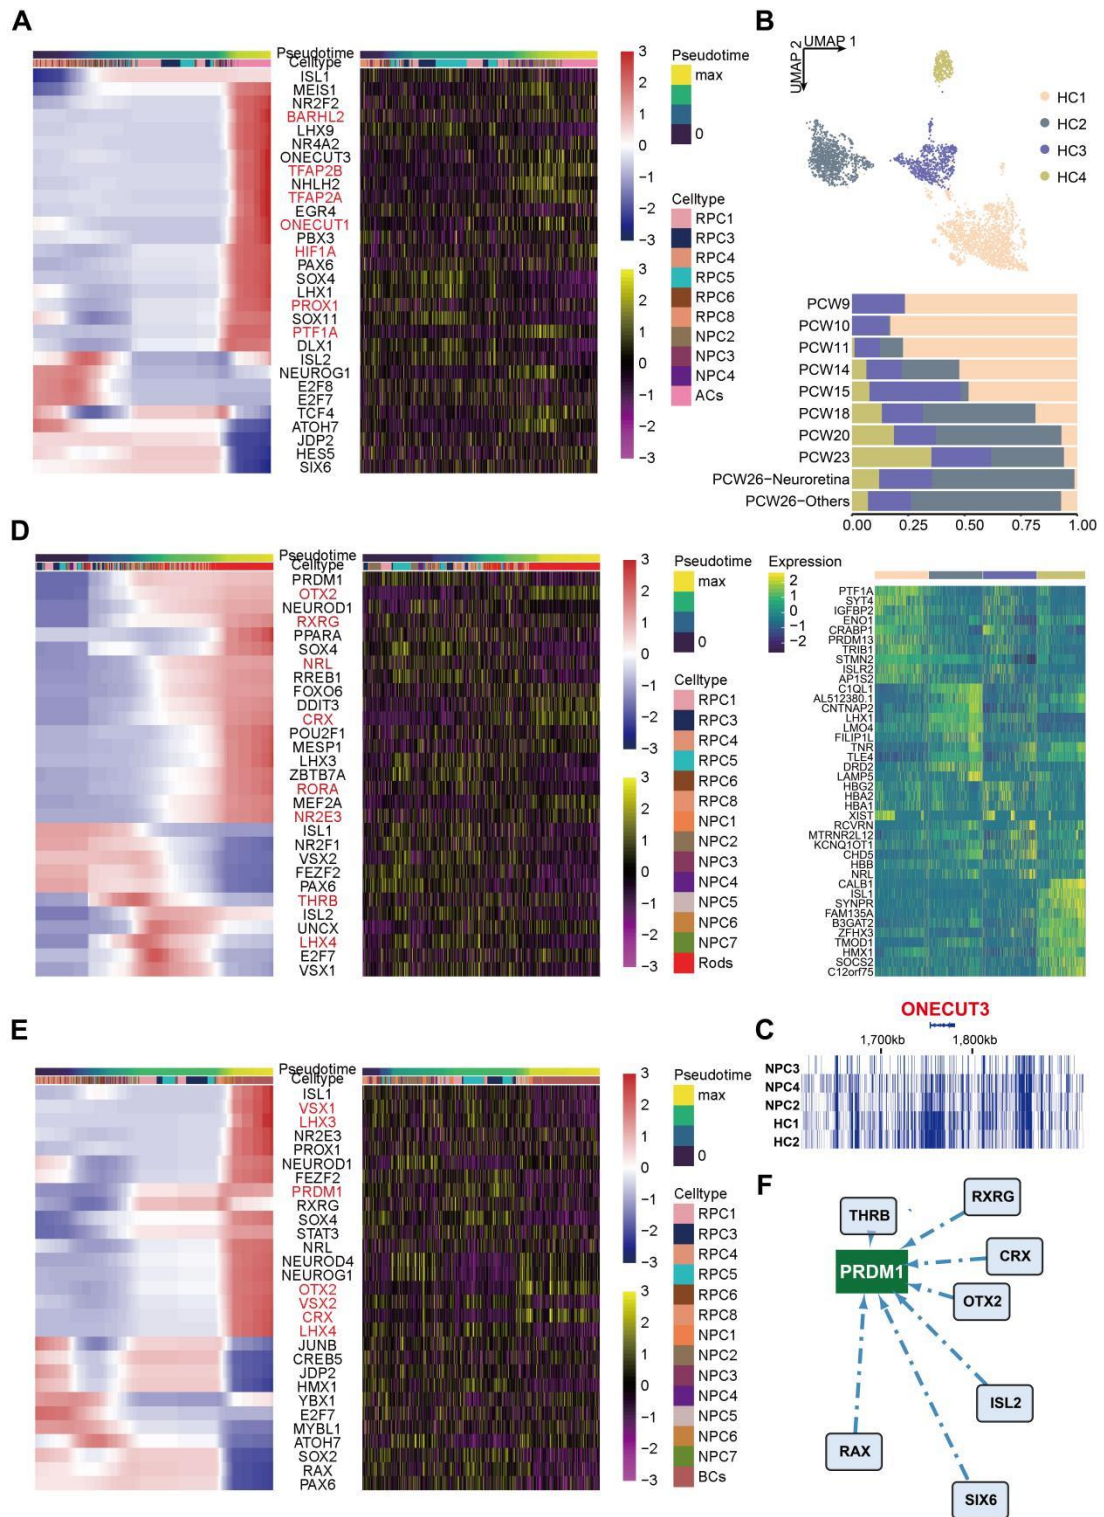

**Figure S9. Transcriptomic and epigenetic atlas of human developing retinal neuronal lineages. (A)** Heatmap of the expression and chromVAR activity scores of the top variable motifs for TFs found in the ACs over pseudo-time (bar at the top) and cell type (bar at the top). **(B)** UMAP embedding, proportion of cell ages and heatmap

of top DEGs for HC subpopulations. **(C)** Heatmap showing the chromVAR accessibility of *ONECUT3* in specific subclusters. **(D and E)** Heatmap of the expression and chromVAR activity scores of the top variable motifs for TFs found in **(D)** rods and **(E)** BCs over pseudo-time (bar at the top) and cell type (bar at the top). **(F)** The regulatory networks of *PRDMI* predicted by the SCENIC analysis.

Figure S10

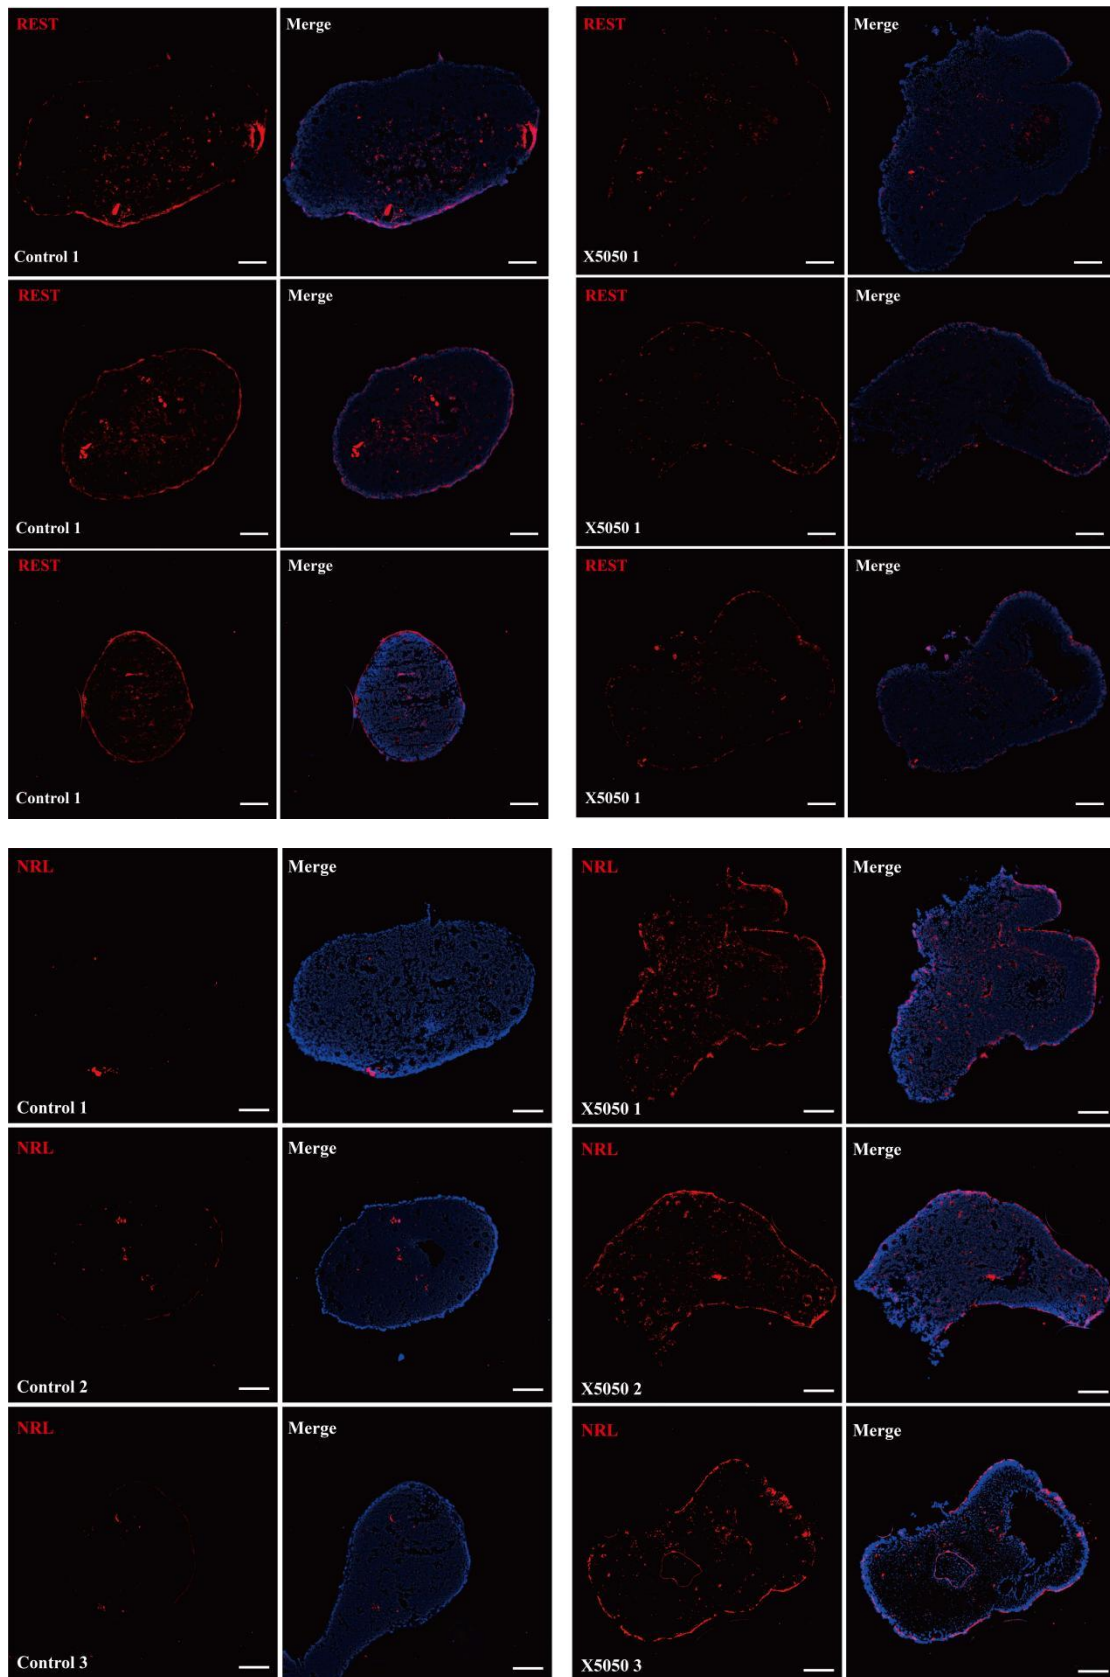

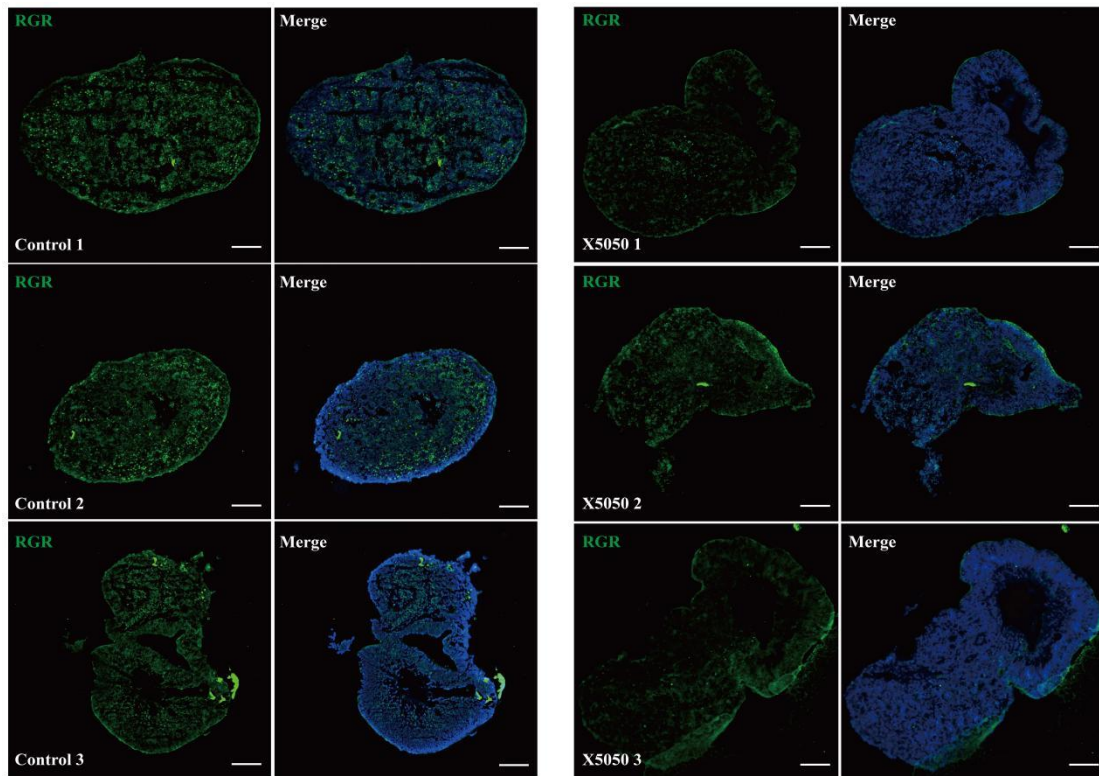

**Figure S10. Immunofluorescence staining of REST, NRL and RGR in control and X5050-treated fetal retinospheres after 48 h. Scale bar, 100  $\mu\text{m}$ .**

## Supplementary Tables

Table S1. Detailed information of samples in scRNA-seq.

| Details<br>PCW        | Estimated number of<br>cells | Mean reads per<br>cell | Median genes per<br>cell | Sample<br>Type   | Sample<br>origin |
|-----------------------|------------------------------|------------------------|--------------------------|------------------|------------------|
| PCW9                  | 15,831                       | 25,368                 | 2,018                    | Whole<br>eyeball | China            |
| PCW10                 | 9,024                        | 77,612                 | 3,235                    | Whole<br>eyeball | China            |
| PCW11                 | 6,535                        | 43,909                 | 2,560                    | Whole<br>eyeball | China            |
| PCW14                 | 9,913                        | 66,003                 | 2,510                    | Whole<br>eyeball | China            |
| PCW15                 | 9,532                        | 30,383                 | 1,664                    | Whole<br>eyeball | China            |
| PCW18                 | 10,061                       | 55,903                 | 2,153                    | Whole<br>eyeball | China            |
| PCW20                 | 11,910                       | 37,180                 | 2,086                    | Whole<br>eyeball | China            |
| PCW23                 | 6,305                        | 56,070                 | 1,717                    | Whole<br>eyeball | China            |
| PCW26-<br>Neuroretina | 7,224                        | 48,622                 | 2,019                    | Whole<br>retina  | China            |
| PCW26-<br>Others      | 7,192                        | 44,029                 | 2,136                    | Others           | China            |



**Table S2. Marker genes for annotation.**

| <b>Cell type</b>                    | <b>Marker genes</b>                    |
|-------------------------------------|----------------------------------------|
| Retinal progenitor cells            | <i>CCND1, HES1, SOX2</i>               |
| Neurogenic retinal progenitor cells | <i>ATOH7, HES6, DLL3</i>               |
| Retinal ganglion cells              | <i>GAP43, SNCG, NEFM, NEFL, POU4F2</i> |
| Horizontal cells                    | <i>ONECUT2, ONECUT1</i>                |
| Amacrine cells                      | <i>GAD1, GAD2, TFAP2A, TFAP2B</i>      |
| Cone photoreceptor cells            | <i>ARR3, PDE6H, GNAT2, PRDM1, THRB</i> |
| Rod photoreceptor cells             | <i>NRL, RHO, RCVRN, NR2E3</i>          |
| Bipolar cells                       | <i>PCP2, VSX1, TMEM215</i>             |
| Müller glial cells                  | <i>RLBP1, RGR, GPX3</i>                |
| Endothelium cells                   | <i>PECAMI, CLDN5, ENG</i>              |
| Fibroblasts                         | <i>DCN, FBLN1, MGP</i>                 |
| Melanocytes                         | <i>MLANA, PMEL, TYRP1, DCT</i>         |
| Corneal epithelium cells            | <i>AQP3, AQP5, KRT14, KRT5, KRT7</i>   |
| Macrophages                         | <i>CIQA, CIQB, CIQC, MRC1, MARCO</i>   |
| Microglia                           | <i>P2RY12, P2RY13, CX3CR1, TMEM119</i> |
| Retinal pigment epithelium          | <i>RPE65, BEST1, TTR, TYR, MITF</i>    |
| Lens cells                          | <i>CRYGC, BFSP1, BFSP2, LIM2</i>       |

**Table S3. Number of all cell types in scRNA-seq.**

| <b>PCW<br/>Clusters</b>       | <b>PCW9</b> | <b>PCW10</b> | <b>PCW11</b> | <b>PCW14</b> | <b>PCW15</b> | <b>PCW18</b> | <b>PCW20</b> | <b>PCW23</b> | <b>PCW26-<br/>Neuroretina</b> | <b>PCW26-<br/>Others</b> | <b>Total</b> |
|-------------------------------|-------------|--------------|--------------|--------------|--------------|--------------|--------------|--------------|-------------------------------|--------------------------|--------------|
| <b>RPCs</b>                   | 4235        | 2417         | 1510         | 2445         | 3136         | 1675         | 3091         | 1133         | 214                           | 161                      | 20017        |
| <b>NPCs</b>                   | 853         | 519          | 411          | 557          | 700          | 559          | 763          | 367          | 262                           | 253                      | 5244         |
| <b>MGCs</b>                   | 0           | 0            | 0            | 1            | 2            | 22           | 6            | 144          | 147                           | 45                       | 367          |
| <b>Rods</b>                   | 291         | 152          | 152          | 420          | 1030         | 1404         | 2241         | 2192         | 1760                          | 1542                     | 11184        |
| <b>HCs</b>                    | 330         | 448          | 443          | 958          | 142          | 526          | 394          | 35           | 256                           | 130                      | 3662         |
| <b>BCs</b>                    | 223         | 134          | 64           | 175          | 322          | 476          | 363          | 668          | 1395                          | 721                      | 4541         |
| <b>ACs</b>                    | 382         | 288          | 424          | 636          | 434          | 746          | 539          | 124          | 214                           | 165                      | 3952         |
| <b>RGCs</b>                   | 1950        | 1958         | 1327         | 618          | 395          | 448          | 702          | 170          | 114                           | 147                      | 7829         |
| <b>Fibroblasts</b>            | 1478        | 438          | 771          | 825          | 550          | 769          | 436          | 66           | 72                            | 1921                     | 7326         |
| <b>Melanocytes</b>            | 2084        | 451          | 124          | 165          | 84           | 119          | 76           | 43           | 6                             | 232                      | 3384         |
| <b>RPE</b>                    | 194         | 52           | 20           | 42           | 22           | 11           | 7            | 1            | 5                             | 65                       | 419          |
| <b>Cones</b>                  | 135         | 145          | 153          | 327          | 580          | 470          | 245          | 117          | 158                           | 80                       | 2410         |
| <b>Lens</b>                   | 308         | 144          | 50           | 146          | 198          | 123          | 179          | 11           | 12                            | 16                       | 1187         |
| <b>Macrophage<br/>s</b>       | 54          | 14           | 25           | 52           | 22           | 105          | 83           | 13           | 5                             | 229                      | 602          |
| <b>Microglia</b>              | 13          | 6            | 11           | 15           | 11           | 17           | 17           | 9            | 17                            | 17                       | 133          |
| <b>Corneal<br/>epithelium</b> | 7           | 0            | 5            | 0            | 2            | 0            | 1            | 1            | 0                             | 0                        | 16           |
| <b>Endothelium</b>            | 32          | 12           | 18           | 61           | 4            | 24           | 11           | 10           | 9                             | 72                       | 253          |

**Table S4. Number of all cell types in scATAC-seq.**

| <b>PCW Clusters</b> | <b>PC W9</b> | <b>PCW10</b> | <b>PCW11</b> | <b>PCW11 -Rep</b> | <b>PCW14</b> | <b>PCW15</b> | <b>PCW18</b> | <b>PCW19</b> | <b>PCW20</b> | <b>PCW23</b> | <b>PCW26-Neuroretina</b> | <b>PCW26-Others</b> | <b>Total</b> |
|---------------------|--------------|--------------|--------------|-------------------|--------------|--------------|--------------|--------------|--------------|--------------|--------------------------|---------------------|--------------|
| <b>HCs</b>          | 204          | 384          | 636          | 1461              | 552          | 136          | 778          | 97           | 113          | 39           | 62                       | 82                  | 4544         |
| <b>RGCs</b>         | 474          | 1721         | 1942         | 2927              | 690          | 306          | 285          | 115          | 177          | 12           | 40                       | 103                 | 8792         |
| <b>ACs</b>          | 62           | 138          | 233          | 479               | 296          | 350          | 497          | 151          | 751          | 81           | 27                       | 48                  | 3113         |
| <b>NPCs</b>         | 370          | 357          | 507          | 1028              | 356          | 1709         | 626          | 258          | 362          | 158          | 10                       | 25                  | 5766         |
| <b>RPCs</b>         | 596          | 970          | 1420         | 2878              | 1179         | 3597         | 2263         | 926          | 908          | 660          | 38                       | 61                  | 15496        |
| <b>Cones</b>        | 13           | 58           | 209          | 964               | 284          | 1446         | 494          | 219          | 120          | 44           | 78                       | 40                  | 3969         |
| <b>Rods</b>         | 7            | 3            | 10           | 131               | 97           | 1519         | 2159         | 260          | 2754         | 1757         | 443                      | 381                 | 9521         |
| <b>BCs</b>          | 22           | 100          | 130          | 479               | 625          | 1093         | 1670         | 433          | 1513         | 996          | 260                      | 229                 | 7550         |
| <b>MGCs</b>         | 0            | 0            | 1            | 1                 | 0            | 1            | 14           | 3            | 3            | 14           | 1                        | 0                   | 38           |
| <b>Endothelium</b>  | 5            | 6            | 10           | 37                | 4            | 5            | 38           | 2            | 1            | 3            | 0                        | 69                  | 180          |
| <b>Fibroblasts</b>  | 470          | 326          | 725          | 1778              | 192          | 716          | 902          | 228          | 36           | 55           | 10                       | 3090                | 8528         |
| <b>Melanocytes</b>  | 1114         | 711          | 322          | 1356              | 150          | 315          | 291          | 179          | 82           | 69           | 65                       | 529                 | 5183         |
| <b>Macrophages</b>  | 28           | 12           | 40           | 287               | 38           | 38           | 86           | 17           | 25           | 14           | 2                        | 402                 | 989          |
| <b>Microglia</b>    | 0            | 0            | 0            | 8                 | 1            | 0            | 0            | 0            | 0            | 0            | 1                        | 1                   | 11           |
| <b>RPE</b>          | 14           | 30           | 13           | 582               | 14           | 9            | 6            | 8            | 2            | 2            | 1                        | 17                  | 698          |
| <b>Lens cells</b>   | 18           | 10           | 40           | 98                | 27           | 86           | 22           | 27           | 415          | 8            | 38                       | 30                  | 819          |

**Table S5. Total number of cells in RPC subpopulations in scRNA-seq.**

| <b>PCW</b><br><b>Clusters</b> | <b>PCW9</b> | <b>PCW10</b> | <b>PCW11</b> | <b>PCW14</b> | <b>PCW15</b> | <b>PCW18</b> | <b>PCW20</b> | <b>PCW23</b> | <b>PCW26-<br/>Neuroretina</b> | <b>PCW26<br/>-Others</b> | <b>Total</b> |
|-------------------------------|-------------|--------------|--------------|--------------|--------------|--------------|--------------|--------------|-------------------------------|--------------------------|--------------|
| <b>RPC1</b>                   | 2565        | 1678         | 100          | 32           | 18           | 12           | 5            | 6            | 1                             | 11                       | 4428         |
| <b>RPC2</b>                   | 0           | 0            | 12           | 25           | 1            | 1183         | 2532         | 19           | 187                           | 84                       | 4043         |
| <b>RPC3</b>                   | 0           | 5            | 1044         | 1752         | 0            | 47           | 4            | 0            | 0                             | 0                        | 2852         |
| <b>RPC4</b>                   | 701         | 420          | 249          | 296          | 85           | 247          | 416          | 64           | 6                             | 7                        | 2491         |
| <b>RPC5</b>                   | 0           | 1            | 0            | 3            | 2347         | 27           | 9            | 3            | 1                             | 2                        | 2393         |
| <b>RPC6</b>                   | 969         | 311          | 101          | 320          | 142          | 93           | 104          | 25           | 15                            | 26                       | 2106         |
| <b>RPC7</b>                   | 0           | 0            | 0            | 0            | 0            | 0            | 0            | 1010         | 0                             | 0                        | 1010         |
| <b>RPC8</b>                   | 0           | 2            | 4            | 17           | 543          | 65           | 21           | 6            | 4                             | 5                        | 667          |
| <b>RPC9</b>                   | 0           | 0            | 0            | 0            | 0            | 1            | 0            | 0            | 0                             | 26                       | 27           |

**Table S6 Total number of cells in NPC subclusters in scRNA-seq.**

| <b>PCW</b><br><b>Subclusters</b> | <b>PCW9</b> | <b>PCW10</b> | <b>PCW11</b> | <b>PCW14</b> | <b>PCW15</b> | <b>PCW18</b> | <b>PCW20</b> | <b>PCW23</b> | <b>PCW26-<br/>Neuroretina</b> | <b>PCW26-<br/>Others</b> | <b>Total</b> |
|----------------------------------|-------------|--------------|--------------|--------------|--------------|--------------|--------------|--------------|-------------------------------|--------------------------|--------------|
| <b>NPC1</b>                      | 1           | 36           | 68           | 188          | 2            | 380          | 583          | 20           | 28                            | 43                       | 1349         |
| <b>NPC2</b>                      | 54          | 103          | 154          | 246          | 96           | 107          | 92           | 17           | 5                             | 14                       | 888          |
| <b>NPC3</b>                      | 302         | 171          | 116          | 104          | 23           | 57           | 72           | 1            | 4                             | 0                        | 850          |
| <b>NPC4</b>                      | 496         | 209          | 72           | 11           | 0            | 1            | 0            | 0            | 0                             | 0                        | 789          |
| <b>NPC5</b>                      | 0           | 0            | 1            | 6            | 577          | 6            | 8            | 0            | 0                             | 0                        | 598          |
| <b>NPC6</b>                      | 0           | 0            | 0            | 2            | 0            | 6            | 8            | 0            | 225                           | 196                      | 437          |
| <b>NPC7</b>                      | 0           | 0            | 0            | 0            | 2            | 2            | 0            | 329          | 0                             | 0                        | 333          |
